# Supplementary material for: Growth Factor Receptor Expression in Oropharyngeal Squamous Cell Cancer: Her1–4 and c-Met in Conjunction with the Clinical Features and Human Papillomavirus (p16) Status
Source: PubMed Central journal article supplement (PMC7697064; doi:10.3390/cancers12113358), 2020-11-13
Supplement: cancers-12-03358-s001.pdf [file cancers-12-03358-s001.pdf]

# Growth Factor Receptor Expression in Oropharyngeal Squamous Cell Cancer: Her1-4 and c-met in Conjunction with the Clinical Features and Human Papillomavirus (p16) Status

Eric Deuss, Dorothee Gößwein, Désirée Gül, Stefanie Zimmer, Sebastian Foersch, Claudia S. Eger, Ivonne Limburg, Roland H. Stauber and Julian Künzel

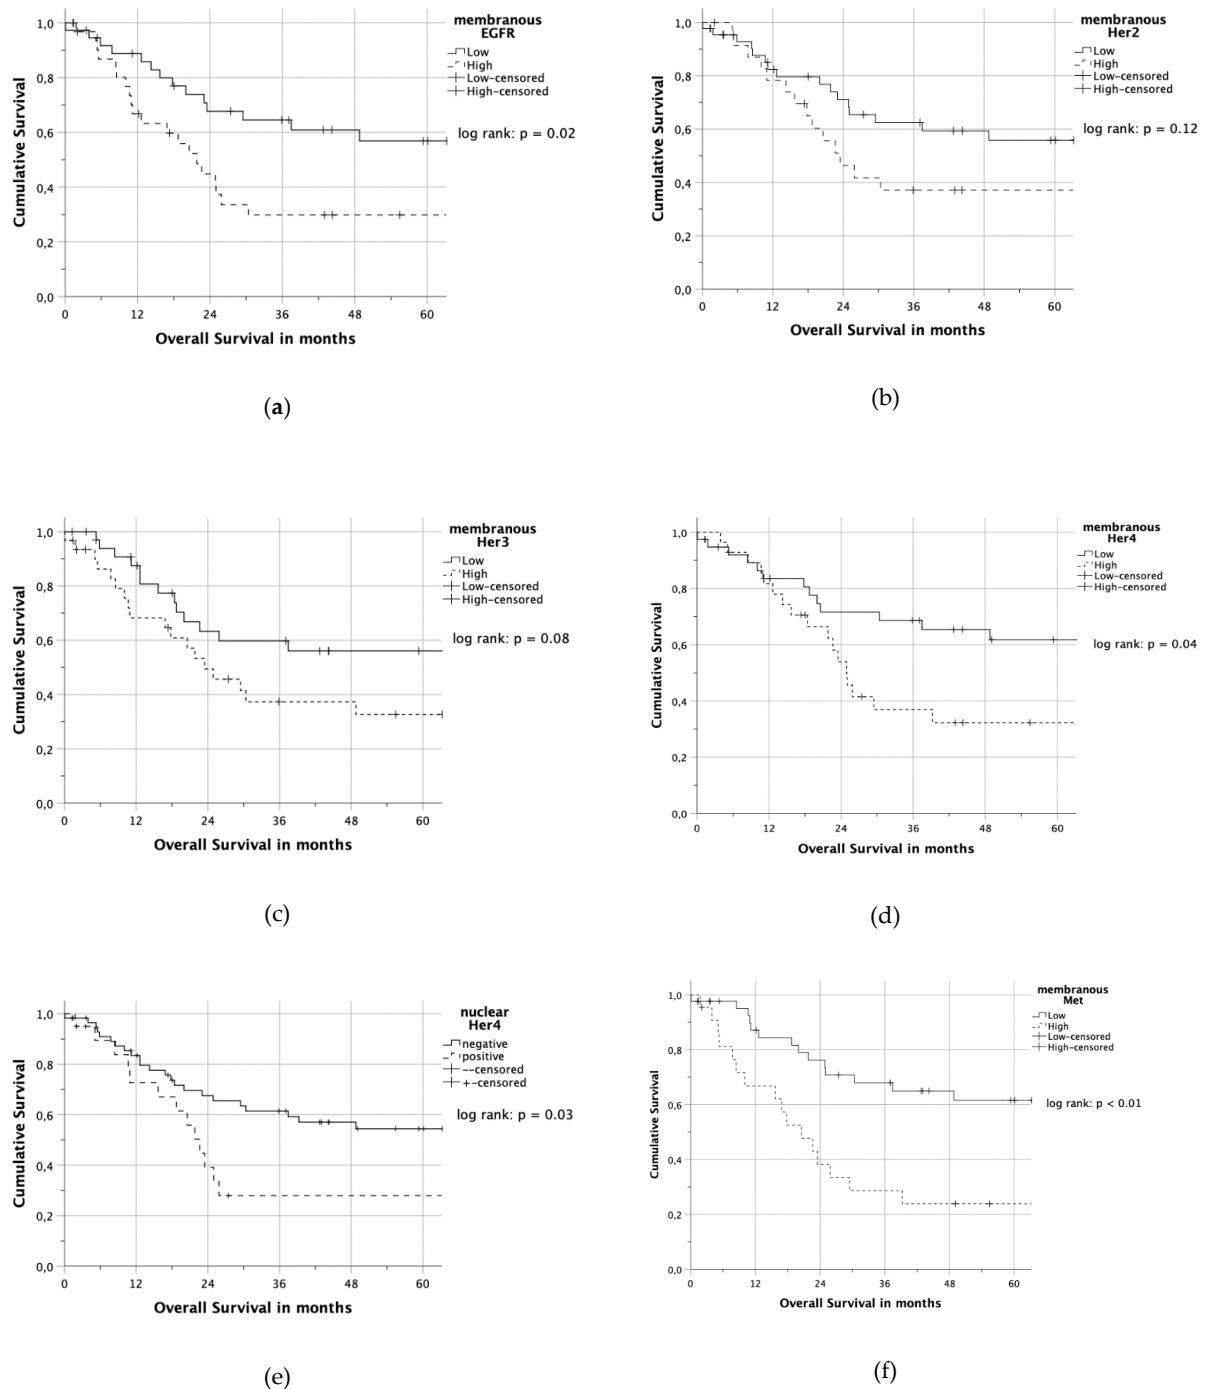

**Figure S1. (a–f):** Kaplan–Meier curves for prognostic impact of EGFR-, Her2-, Her3-, membranous or nuclear Her4- and c-Met expression on five-year overall survival.

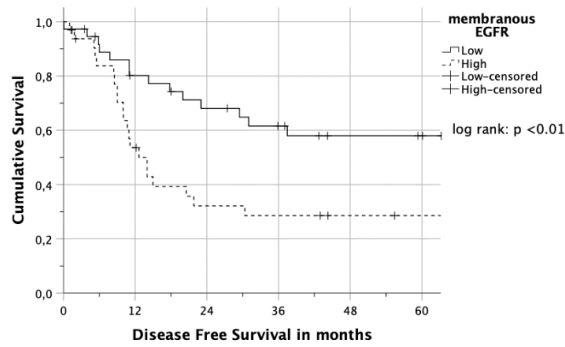

(a)

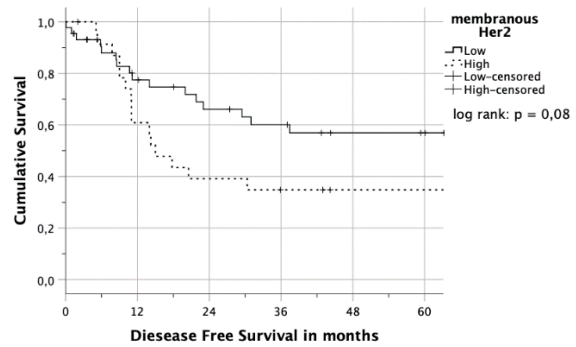

(b)

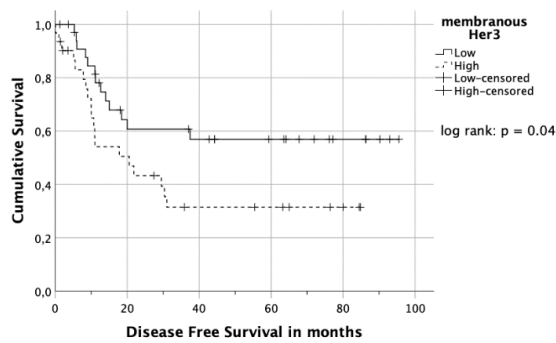

(c)

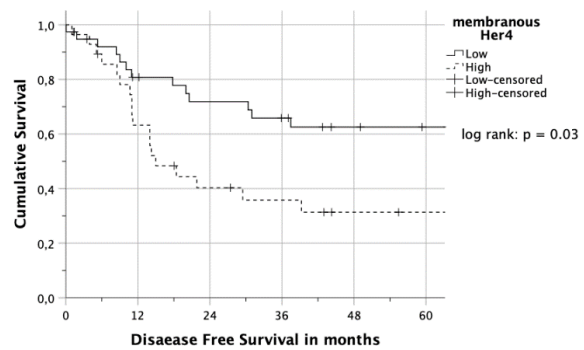

(d)

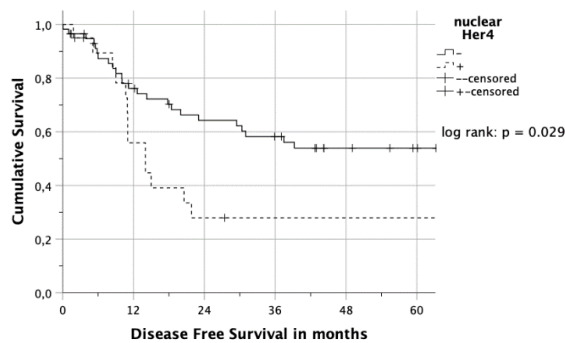

(e)

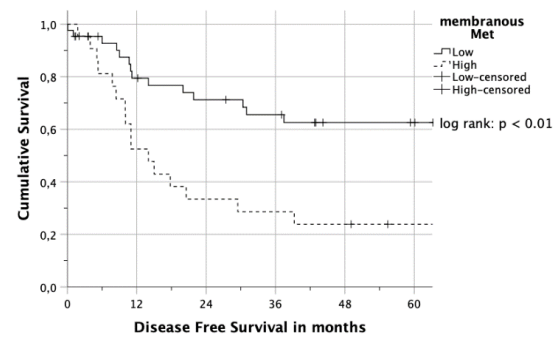

(f)

**Figure S2 (a–f):** Kaplan–Meier curves for prognostic impact of EGFR-, Her2-, Her3-, membranous or nuclear Her4- and c-Met expression on five-year disease-free survival.

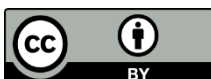

© 2020 by the authors. Licensee MDPI, Basel, Switzerland. This article is an open access article distributed under the terms and conditions of the Creative Commons Attribution (CC BY) license (<http://creativecommons.org/licenses/by/4.0/>).
